# Supplementary material for: A functional genetic toolbox for human tissue-derived organoids
Source: eLife journal article supplement (doi:10.7554/elife.67886), 2021-10-06
Supplement: supp4 [file Summary of gel and blots source data after adjusted.pdf › Summary of gel and blots source data after adjusted.pdf]

Figure 3e

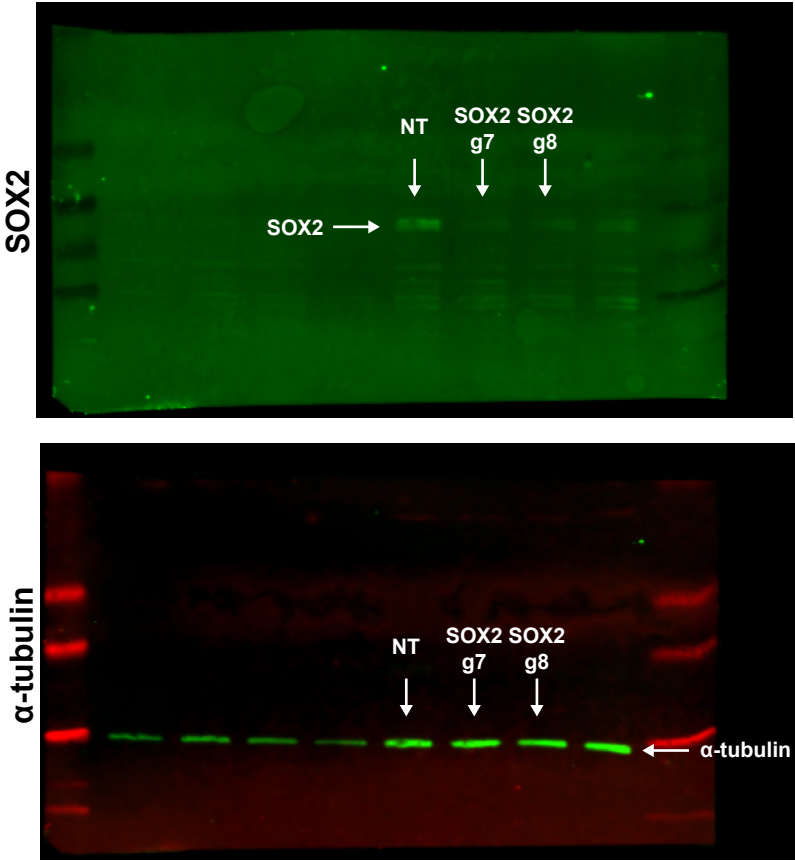

Figure 2-S2F

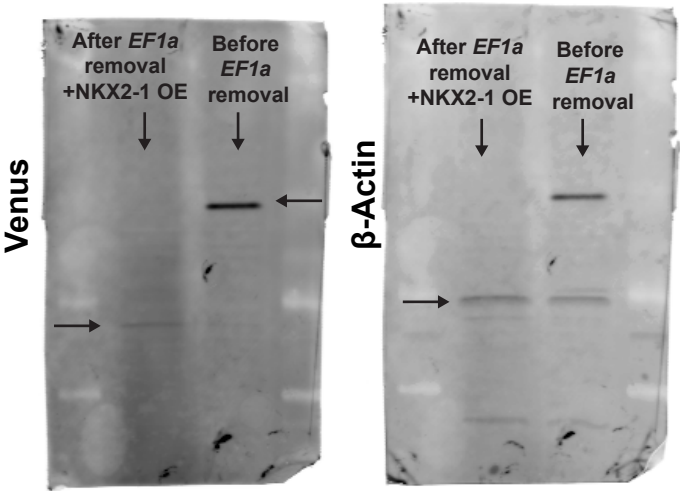

Please use ImageJ to open the raw data .TIF files.

Please use ImageJ to open the raw data .scn files

Figure 1-Figure Supplement 1c.

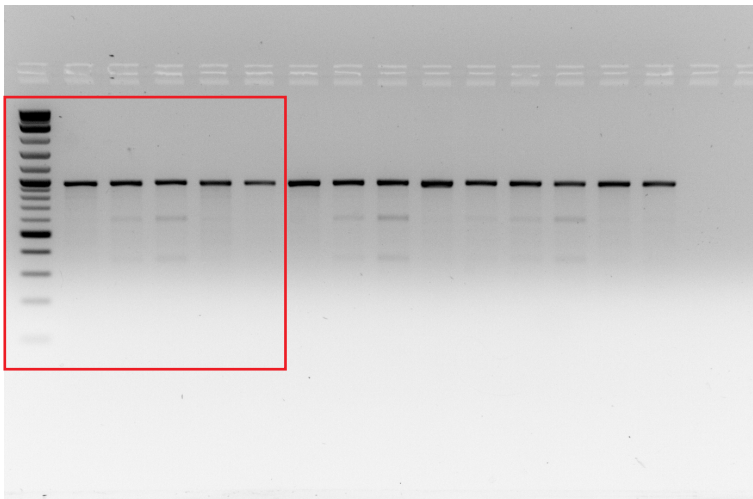

Red square labels the part of figure used

Figure 2-Figure Supplement 1c.

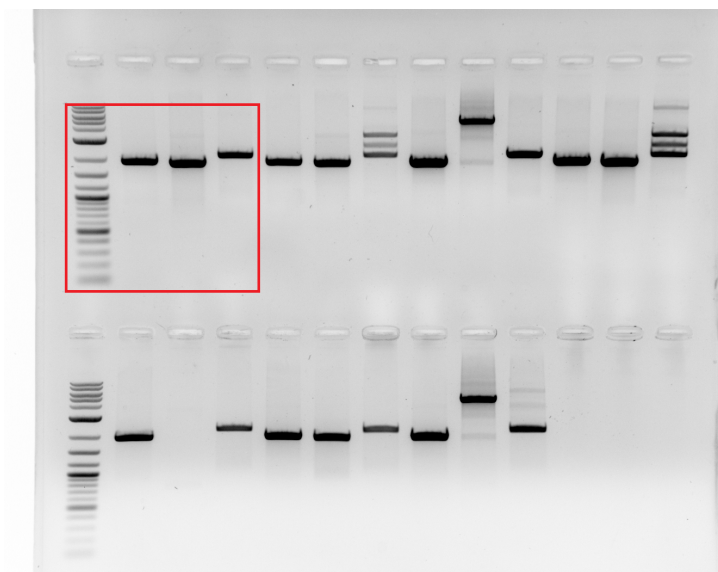

Red square labels the part of figure used

Figure 2-Figure Supplement 3b.

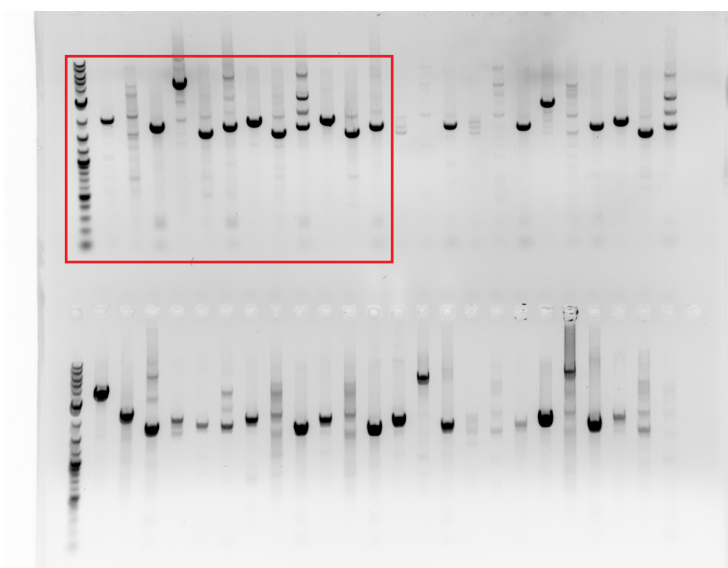

Red rectangle labels the part of figure used

Please use ImageJ to open the raw data .scn files

Figure 2-Figure Supplement 3e.

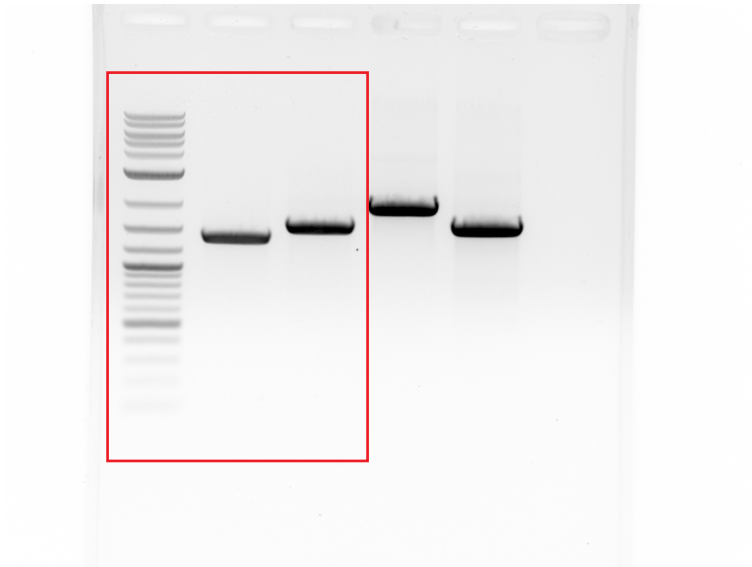

Red rectangle labels the part of figure used

Figure 2-Figure Supplement 4d.

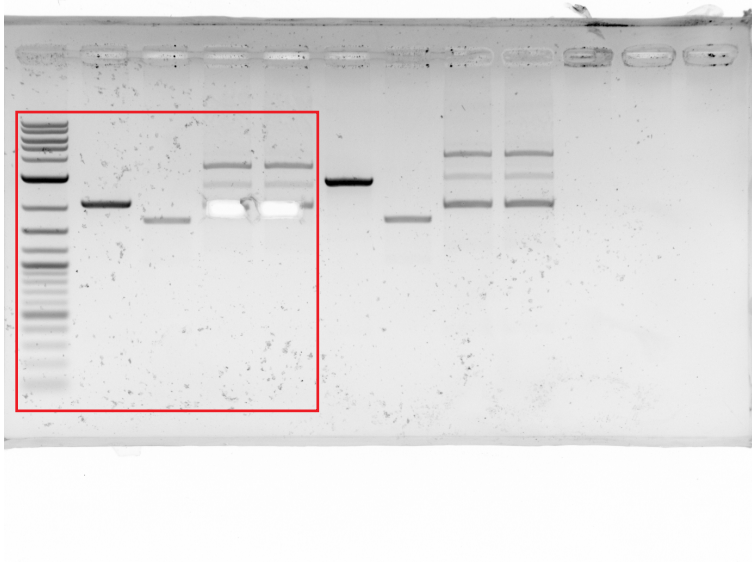

Red square labels the part of figure used

Figure 2-Figure Supplement 4f.

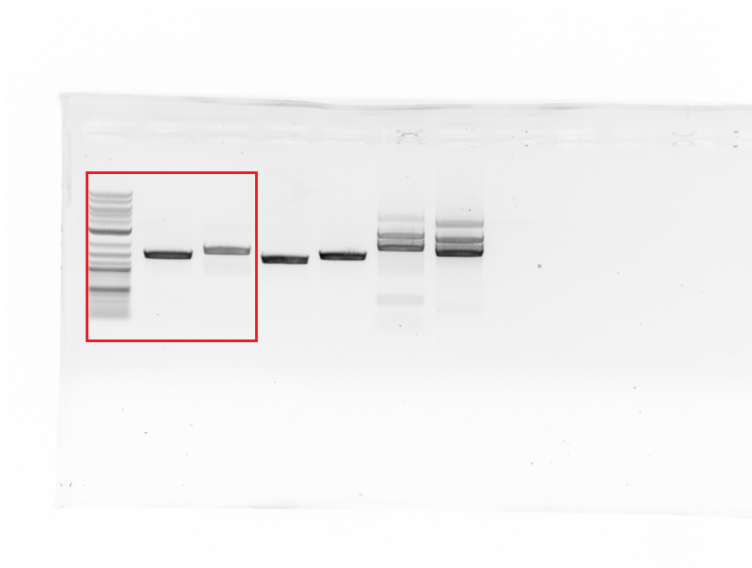

Red square labels the part of figure used

Please use ImageJ to open the raw data .scn files

Figure 2-Figure Supplement 5b.

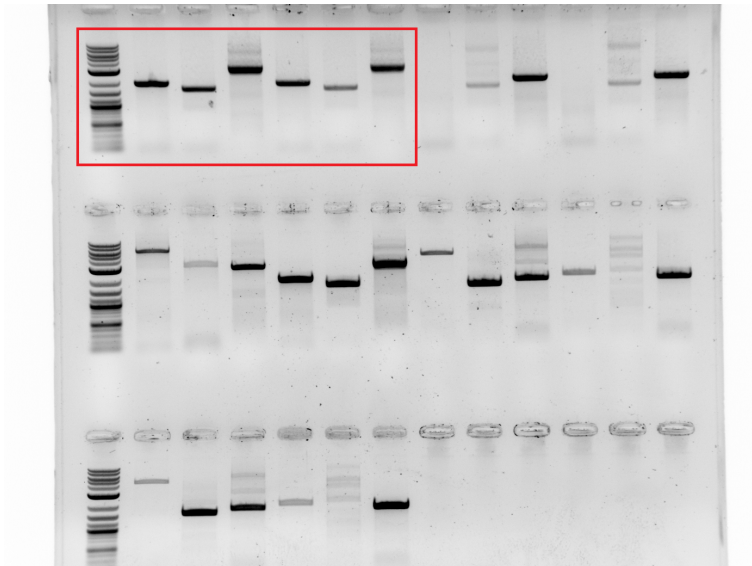

Red rectangle labels the part of figure used

Figure 2-Figure Supplement 5e.

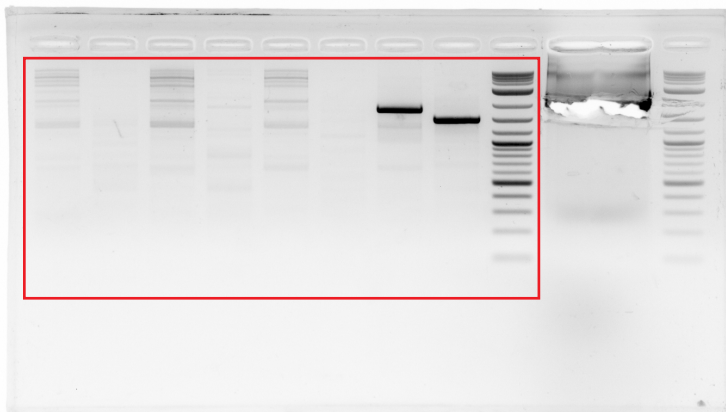

Red rectangle labels the part of figure used
