# Supplementary material for: A functional genetic toolbox for human tissue-derived organoids
Source: eLife. 2021 Oct 6;10:e67886. doi: 10.7554/eLife.67886 (PMC8553336; doi:10.7554/eLife.67886)
Supplement: Supplementary file 1. [file elife-67886-supp1.xlsx]

## Sheet: Sheet1
			Human foetal lung organoids						Summary	Human foetal intestinal organoids
	Genetic manipulations		BRC1915	BRC1943	BRC2174	BRC1929	BRC1938	HDBR-N13393		BRC2297
	mEGFP-ACTB	Lines derived (correct/total)	9/15	8/13		0/1	No colony forming		17/29 = 59%
		Number of cells nucleofected	800K	800K		800K	800K			600K
	SOX9-T2A-EGFP	Lines derived (correct/total)	4/10	2/6*	3/7				9/23 = 39%	2/4* = 50%
		Number of cells used	800K	400K	400K					600K
	AAVS1-EF1a-TagRFP-CAAX	Lines derived (correct/total)		4/6*					4/6 = 67%
		Number of cells used		800K
	SOX2 H2BEGFP/+	Lines derived (correct/total)		3/6					3/6 = 50%
		Number of cells used		400K
	SOX2 KO	Lines derived (correct/total)		3/6					3/6 = 50%
		Number of cells used		400K
	SFTPC	Lines derived (correct/total)		1/16					1/16 = 6.25%
		Number of cells used		1.2M
	TP63	Lines derived (correct/total)	1/2	3/8					4/10 = 40%
		Number of cells used	400K	400K
	CRISPRi		√		√	√	No colony forming	√
	CRISPRa		√					√
			*Many colonies formed after cell sorting and only a fraction of colonies were used to derive organoid lines
			√Tested and suitable for application
