# Supplementary material for: A functional genetic toolbox for human tissue-derived organoids
Source: eLife. 2021 Oct 6;10:e67886. doi: 10.7554/eLife.67886 (PMC8553336; doi:10.7554/eLife.67886)
Supplement: Supplementary file 3. — Summary of qRT-PCR results, flow cytometry quantification results of DNA delivery efficiency, small-molecule function and CRISPRi kinetics analysis and ICE analysis results. [file elife-67886-supp3.xlsx]

## Sheet: qRT-PCR results
Fig. 3e
gRNA and Condition	SOX2 relative expression level in different bioreplicates						Mean	SEM	T-test
Non-targeting gRNA	1	1.07313	0.878443	1.24093			1.04813	0.0757782	0.499654
Non-targeting gRNA +Dox + TMP	1.12848	1.35727	0.994699	1.20043			1.17022	0.0755262	0.861315
SOX2 gRNA	1.08836	1.77566	0.798187	1.18209			1.21107	0.205169
SOX2 gRNA + Dox + TMP	0.40862	0.296117	0.456792	0.305952	0.327875	0.396644	0.365333	0.026419	0.0248385
Fig. 4c
gRNA and Condition	Log2 SFTPC relative expression level in different bioreplicates					Mean	SEM	T-test
Non-targeting gRNA +Dox	0	3.03926	-1.78158			0.419226	1.40735
SFTPC gRNA +Dox	22.7048	22.729	9.8986	9.038	19.931	16.8603	3.06336	0.00373248
Figure 3-figure supplement 1d													Figure 3-figure supplement 1e.
gRNA and Condition	SOX2 relative expression level in different bioreplicates							Mean	SEM	T.test (with NT control)	T.test (between ±Dox)			MYCN	KRAB-dCas9
Non-targeting gRNA + Dox	1	0.80335	0.848625	0.705702				0.839419	0.0612727				1915 SOX2 g2	0.999999	0.955632
SOX2 gRNA	0.418874	0.326014	0.458059					0.400983	0.0391538	0.00214046			1915 SOX2 g8	1.04799	1.37237
SOX2 gRNA + Dox	0.341024	0.65633	0.435291	0.504674	0.295032	0.370914	0.458059	0.437332	0.0454776	0.00164748	0.564169		13393 SOX2 g2	1.22382	1.99647
													13393 SOX2 g8	1.55613	1.72443
Figure 3-figure supplement 2d. SOX2 CRISPRi kinetics
	1915 NT		1915-SOX2 gRNAs		13393-NT		13393-SOX2 gRNAs
	1915 NT1	1915 NT2	1915 SOX2 g2	1915 SOX2 g8	13393 NT1	13393 NT2	13393 SOX2 g2	13393 SOX2 g8
Adding Dox_TMP_Day 1	1	0.904	0.329	0.348	1	1.07835	0.47168	0.448612
Adding Dox_TMP_Day 3	1	0.862	0.241	0.387	1	0.870378	0.34532	0.356125
Adding Dox_TMP_Day 5	1	0.986937	0.325352	0.373131	0.99847	0.973526	0.36979	0.413838
Dox_TMP_RM_Day 8	0.999895	0.988101	0.264164	0.319565	1	0.982767	0.47504	0.507384
Dox_TMP_RM_Day 10	0.999756	0.861788	0.459104	0.567952	1	1.06042	0.983382	0.910611
Dox_TMP_RM_Day 14	1.00034	1.43275	1.26047	1.41903	1	0.85767	0.791703	0.785608
Dox_TMP_RM_Day 18	1.00007	0.856348	0.92889	0.95941	1	1.1291	0.853201	1.01123
Figure 4-figure supplement 1a CRISPRi SOX2 knockdown					Figure 4-figure supplement 1b CRISPRa SFTPC activation Log2 relative expression
gRNA and Condition	Organoid 1915	Organoid 13393	Mean		gRNA and Condition	Organoid 1915	Organoid 13393	Mean
Non-targeting gRNA 1	1	1.07313	1.03657		Non-targeting gRNA 1 + Dox	0	3.03926	1.51963
Non-targeting gRNA 1 + Dox + TMP	1.12848	1.35727	1.24288		Non-targeting gRNA 3 + Dox	-1.78158		-1.78158
Non-targeting gRNA 2	0.878443	1.24093	1.05969		SFTPC gRNA 1 +Dox	22.7048	22.729	22.7169
Non-targeting gRNA 2 + Dox + TMP	0.994699	1.20043	1.09756		SFTPC gRNA 2 +Dox	9.8986	9.038	9.4683
SOX2 gRNA 2 + Dox + TMP	0.40862	0.296117	0.352369		SFTPC gRNA 3 +Dox		19.931	19.931
SOX2 gRNA7	1.08836	1.77566	1.43201
SOX2 gRNA7 + Dox + TMP	0.456792	0.305952	0.381372
SOX2 gRNA8	0.798187	1.18209	0.990138
SOX2 gRNA8 + Dox + TMP	0.327875	0.396644	0.362259

## Sheet: DNA delivery efficiency
Figure1-Figure Supplement 1a. DNA delivery efficiency quantified by flow cytometry
	Lipofectamine	Lentivirus	Nulceofection (EA125)	Nulceofection (EA104)
Organoid BRC1915	0.2	0.487	0.662	0.443
Organoid BRC1943	0.0689	0.601	0.655
Organoid BRC1938	0.0837	0.576	0.699	0.357
Organoid BRC1929	0.154	0.583	0.66	0.433
Mean	0.12665	0.56175	0.669	0.411
SEM	0.0306975	0.0254669	0.0101078	0.0271539

## Sheet: DNA cleavage efficiency
Supplementary Fig. 1d DNA cleavage efficiency quantified using ICE anlysis
	ssRNP	tr/cr RNP	1 μg plasmid	10 μg plasmid
Organoid BRC1915	0.23	0.11	0.01	0
Organoid BRC1943	0.24	0.13	0.01	0.08
Organoid BRC1938	0.23	0.09	0.02	0.03
Mean	0.233333	0.11	0.0133333	0.0366667
SEM	0.00333333	0.011547	0.00333333	0.0233333

## Sheet: Small Molecule function
Figure 1-Figure Supplement 2b. Small molecule fcuntion quantified by flow cytometry of %EGFP+ cells
	DMSO	RS-1	L755507	SCR-7
Organoid BRC1929	0.0344	0.0451	0.0405	0.0423
Organoid BRC1915	0.0454	0.0463	0.0333	0.055
Organoid BRC1943	0.0358	0.0356	0.0333	0.0684
Mean	0.0385333	0.0423333	0.0357	0.0552333
SEM	0.00345704	0.00338444	0.0024	0.00753532

## Sheet: CRISPRi kinetics test
Figure 3-Figure supplement 2b. CD71 as an example to test CRISPRi kinetics
	CD71 low cells %
	2174 CD71 g2	2174 CD71 g3	13393 CD71 g2	13393 CD71 g3	Mean	SEM
Adding Dox_TMP_Day 1	12.1	20.6	34.6	30.6	24.475	5.06777
Adding Dox_TMP_Day 2	35.4	34.2	77.5	65.4	53.125	10.8672
Adding Dox_TMP_Day 3	71.8	62.4	85.3	78.3	74.45	4.87143
Adding Dox_TMP_Day 4	86.5	80.1	94.9	95.3	89.2	3.6492
Adding Dox_TMP_Day 5	90.5	87.8	91.9	93.1	90.825	1.13972
Dox_TMP_RM_Day 6	77.8	83.2	88.8	93.2	85.75	3.34801
Dox_TMP_RM_Day 8	68.1	82.5	51	68.1	67.425	6.44171
Dox_TMP_RM_Day 10	56.5	73.7	49.2	31.8	52.8	8.68169
Dox_TMP_RM_Day 14	21.2	29.6	9.59	2.22	15.6525	6.07243
Dox_TMP_RM_Day 18	0.3	1.6	1.32	0.48	0.925	0.316267
After adding Dox TMP back_Day23	77.8	92	92.3	73.6	83.925	4.82586
